Development 135, 3473 (2008) doi:10.1242/dev.022053

## A dual requirement for Iroquois genes during *Xenopus* kidney development

**Pilar Alarcón, Elisa Rodríguez-Seguel, Ana Fernández-González, Ruth Rubio and José Luis Gómez-Skarmeta**

There was an error published in *Development* **135**, 3197-3207 in the ePress and the online versions.

On p. 3204, the left- and right-hand columns of text were transposed.

The online issue has now been corrected. The print copy is correct.

We apologise to authors and readers for this mistake.
